# Supplementary material
Source: publisher figshare collection journal article supplement (https://springernature.figshare.com/ndownloader/files/11763263)
Supplement: Supplementary file [file 11763263]

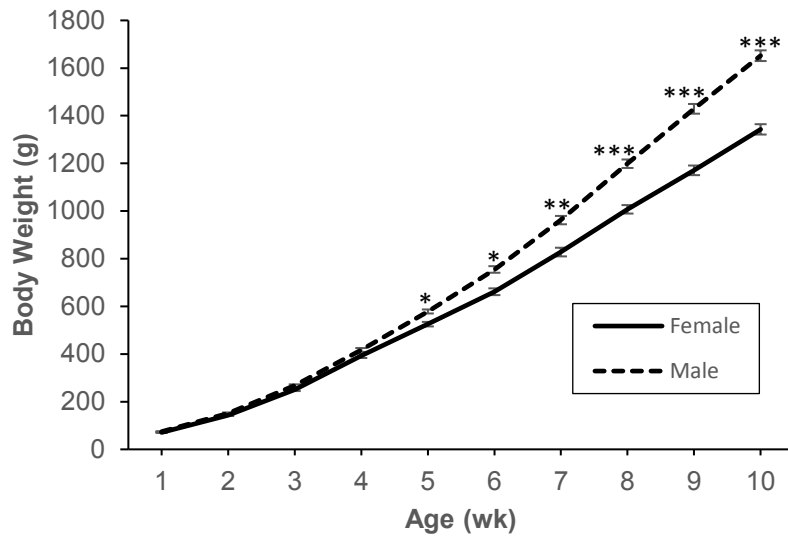

**Supplementary Data Figure 1: Average weekly body weights for male and female chickens in a genetically distinct line.** The average weekly body weights for male (n=57) and female (n=52) from broiler-layer hybrid line fed on an *ad libitum* diet. P values are from a repeated measure ANOVA with different labels (\*= $p < 0.05$ , \*\*= $p < 0.01$ , \*\*\*= $p < 0.001$ ) indicating differences between means from post hoc tests.
